# Supplementary material for: Increased NOS2 predicts poor survival in estrogen receptor–negative breast cancer patients
Source: JCI journal article supplement (doi:10.1172/jci42059), 2010-11-01
Supplement: sd1 [file 1]

## Supplementary Data

**Supplementary Table 1 – Demographic and clinicopathological features of cases<sup>1</sup>**

|                                              |                          | N           | %   |
|----------------------------------------------|--------------------------|-------------|-----|
| ER Status                                    | Negative                 | 102         | 41% |
|                                              | Positive                 | 145         | 59% |
| TNM Stage                                    | <= II                    | 184         | 71% |
|                                              | >= III                   | 44          | 29% |
| Grade                                        | 1 & 2                    | 108         | 50% |
|                                              | 3                        | 107         | 50% |
| Race <sup>2</sup>                            | AA                       | 143         | 58% |
|                                              | EA                       | 105         | 42% |
| p53 mutation                                 | Negative                 | 200         | 81% |
|                                              | Positive                 | 48          | 19% |
| Chemotherapy <sup>3</sup>                    | No                       | 99          | 43% |
|                                              | Yes                      | 132         | 57% |
| NOS2                                         | Negative                 | 43          | 17% |
|                                              | Weak                     | 32          | 13% |
|                                              | Moderate                 | 72          | 29% |
|                                              | High                     | 101         | 41% |
| Survival                                     | Alive                    | 163         | 66% |
|                                              | Death from breast cancer | 74          | 30% |
|                                              | Death from other causes  | 11          | 4%  |
| <b>Breast Cancer Subtypes</b>                |                          |             |     |
| ER+ (“Luminal A”)                            |                          | 83          | 33% |
| ER+/HER2+ (“Luminal B”) <sup>4</sup>         |                          | 61          | 25% |
| Basal-like (IHC-based)                       |                          | 41          | 16% |
| ER-/HER2+                                    |                          | 32          | 13% |
| Triple-negative (ER-/PR-/HER2-) <sup>5</sup> |                          | 56          | 23% |
|                                              |                          | mean ± SD   |     |
| Age at Diagnosis ( n = 248)                  |                          | 55.0 ± 13.9 |     |
| Body mass index ( n = 236)                   |                          | 29.0 ± 8.1  |     |
| CD31 ( n = 208) <sup>6</sup>                 |                          | 49.1 ± 43.9 |     |
| CD68 ( n = 247) <sup>7</sup>                 |                          | 97.3 ± 56.9 |     |

<sup>1</sup>Cases with missing information are not included. SD = standard deviation. Race/ethnicity is determined by self-identification. <sup>2</sup>AA=African-American, EA=European-American. <sup>3</sup>Includes neoadjuvant therapy. <sup>4</sup>Few luminal B tumors are HER2-negative. <sup>5</sup>PR status was not available for all tumors in the study. <sup>6</sup>Number of CD31-positive microvessels per 200x field in the most vascular regions of the tumor as average of 3 representative fields. <sup>7</sup>Number of CD68-positive monocytes/macrophages per 250x field as average of 3 representative fields.

**Supplementary Table 2 – Publications linking NOS2 gene signature to basal-like breast cancer**

| <b>GenBankID</b> | <b>Gene Symbol</b> | <b>Publications Linking to Basal-like breast cancer</b> |
|------------------|--------------------|---------------------------------------------------------|
| AL569511         | <i>KRT6A/B/C/E</i> | Livasy, Rakha , Charafe-Jauffret,                       |
| J00269           | <i>KRT6A/C/E</i>   | Livasy, Rakha, Charafe-Jauffret                         |
| NM_021804        | <i>ACE2</i>        |                                                         |
| L42612           | <i>KRT6B</i>       | Livasy, Charafe-Jauffret                                |
| AI831452         | <i>KRT6B</i>       | Livasy, Charafe-Jauffret                                |
| NM_025087        | <i>FLJ21511</i>    |                                                         |
| NM_000422        | <i>KRT17</i>       | Dabbs, Charafe-Jauffret, Sorlie                         |
| Z19574           | <i>KRT17</i>       | Dabbs, Charafe-Jauffret, Sorlie                         |
| NM_000584        | <i>IL8</i>         |                                                         |
| NM_003064        | <i>SLPI</i>        | Charafe-Jauffret, Sorlie                                |
| NM_018004        | <i>TMEM45A</i>     |                                                         |
| NM_002964        | <i>S100A8</i>      | Charafe-Jauffret, Sorlie                                |
| L25541           | <i>LAMB3</i>       | Charafe-Jauffret                                        |
| NM_001793        | <i>CDH3</i>        | Arnes, Matos, Paredas, Potemski, Charafe-Jauffre        |
| AB018009         | <i>SLC7A5</i>      |                                                         |
| NM_018455        | <i>C16orf60</i>    |                                                         |
| X57348           | <i>SFN</i>         | Leibl, Charafe-Jauffret                                 |
| NM_001630        | <i>ANXA8</i>       | Stein, Charafe-Jauffret                                 |
| NM_005629        | <i>SLC6A8</i>      |                                                         |
| NM_012101        | <i>TRIM29</i>      | Charafe-Jauffret                                        |
| NM_002061        | <i>GCLM</i>        |                                                         |
| AF132818         | <i>KLF5</i>        | Charafe-Jauffret, Sorlie,                               |
| NM_022121        | <i>PERP</i>        | Charafe-Jauffret, Sorlie                                |
| NM_003878        | <i>GGH</i>         |                                                         |
| NM_007196        | <i>KLK8</i>        | Sorlie                                                  |
| NM_016593        | <i>CYP39A1</i>     | Sorlie                                                  |
| NM_003662        | <i>PIR</i>         |                                                         |
| NM_001047        | <i>SRD5A1</i>      | Sorlie                                                  |
| X57348           | <i>SFN</i>         | Leibl, Charafe-Jauffret                                 |
| NM_005342        | <i>HMGB3</i>       |                                                         |
| NM_006623        | <i>PHGDH</i>       | Sorlie                                                  |
| AV712602         | <i>PTPLB</i>       | Sorlie                                                  |
| X16447           | <i>CD59</i>        | Charafe-Jauffret                                        |
| NM_003392        | <i>WNT5A</i>       |                                                         |
| NM_000611        | <i>CD59</i>        | Charafe-Jauffret                                        |
| BE964473         | <i>RPE</i>         |                                                         |
| NM_000050        | <i>ASS</i>         |                                                         |
| NM_002633        | <i>PGM1</i>        |                                                         |
| D84454           | <i>SLC35A2</i>     |                                                         |
| BF116254         | <i>TPI1</i>        |                                                         |
| NM_005333        | <i>HCCS</i>        | Sorlie                                                  |
| NM_001428        | <i>ENO1</i>        |                                                         |
| NM_000610        | <i>CD44</i>        | Charafe-Jauffret                                        |
| BF939365         | <i>CALU</i>        |                                                         |
| NM_014637        | <i>MTFR1</i>       |                                                         |
| NM_000365        | <i>TPI1</i>        |                                                         |
| AF289489         | <i>ASPH</i>        |                                                         |
| BC003375         | <i>MRPL3</i>       |                                                         |
| AI186712         | <i>PPP1CB</i>      |                                                         |

**A**

% Relapse – ER negative Karolinska

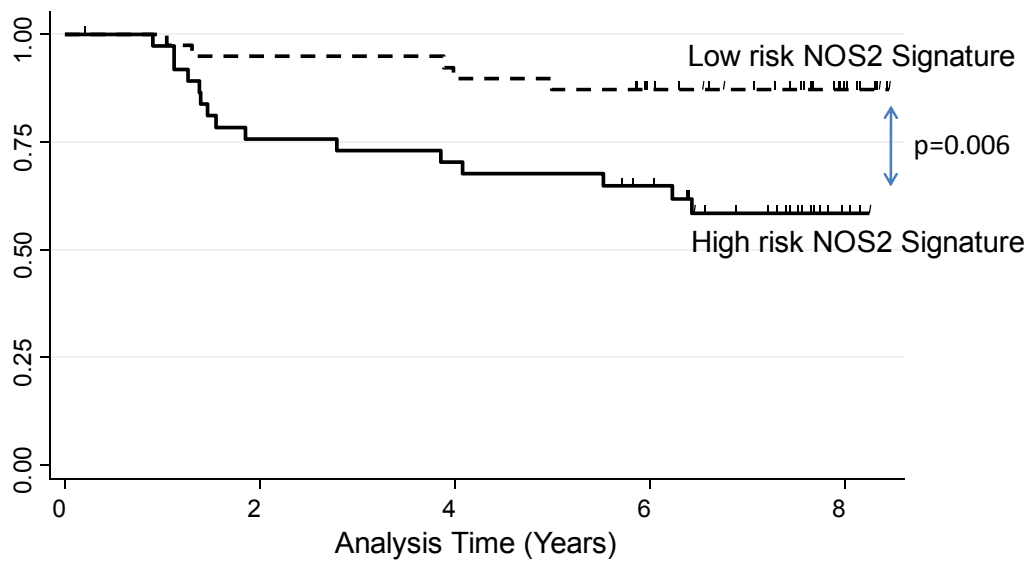**B**

% Survival – ER negative Karolinska

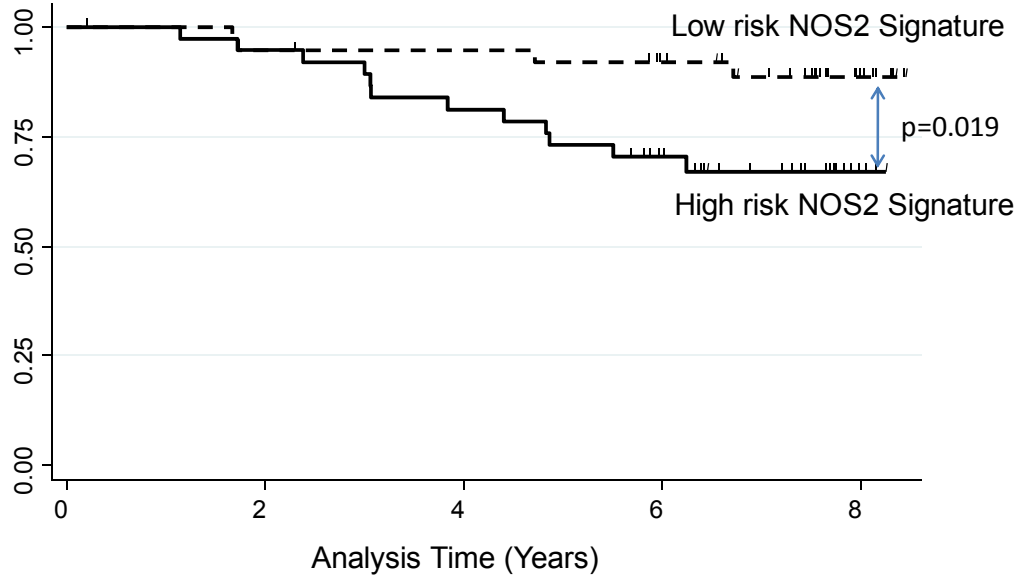

**Supplementary Figure 1 – NOS2 gene signature predicts survival in ER-negative breast cancer cases from the Karolinska data set. (A) Relapse-free survival. (B) Overall survival. Patients with the NOS2 gene signature (high risk NOS2 signature) have significantly poorer survival than patients without it (low risk NOS2 signature).**

**A**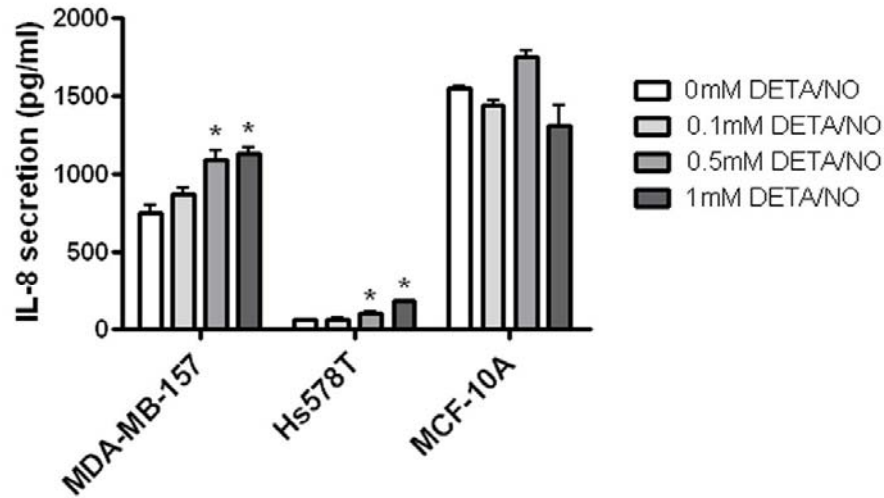**B**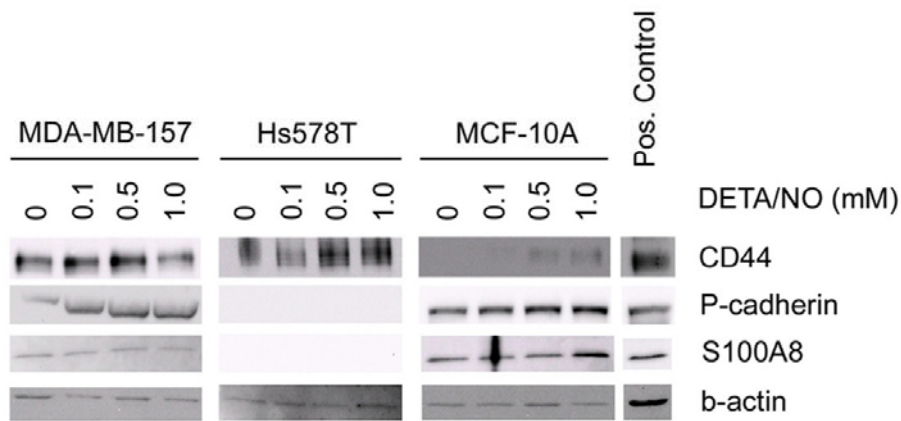

**Supplementary Figure 2 – Induction of IL-8, S100A8, CD44, and P-cadherin in ER-negative epithelial breast cell lines after exposure to the NO donor, DETA/NO.**

(A) DETA/NO induced IL-8 secretion in the two ER-negative breast cancer cell lines, MDA-MB-157 and Hs578T, over a 48 hr exposure, but not in the ER-negative, non-tumorigenic MCF-10A cells. Shown are mean  $\pm$  SD. \*  $P < 0.05$  student's t-test. (B) Induction of CD44, P-cadherin and S100A8 in the ER-negative cell lines MDA-MB-157, Hs578T, and MCF10A cells, over a 48hr exposure. Hs578T cells did not express P-cadherin and S100A8 at a detectable level.

**A**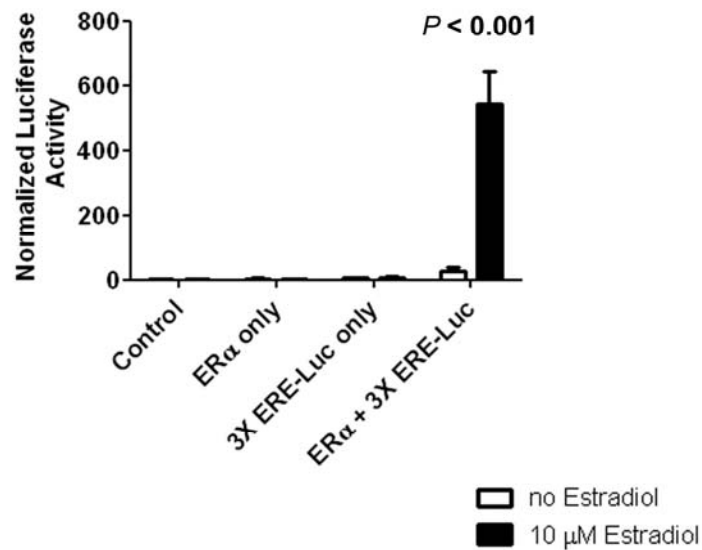**B**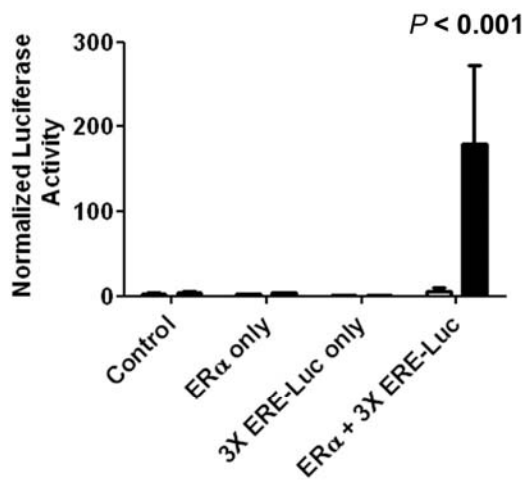

**Supplementary Figure 3 – ER $\alpha$  transcriptional activity in ER-negative breast cancer cells after transfection with an estrogen receptor  $\alpha$  expression plasmid.** (A) MDA-MB-231 and (B) MDA-MB-468 cells were transfected with an expression plasmid for the estrogen receptor  $\alpha$  (ER $\alpha$ ) and the transcriptional activity of the expressed receptor in these cells was determined with a luciferase reporter construct containing 3 estrogen response elements (3X ERE-Luc). The reporter was activated in the two cell lines by the ER $\alpha$  transgene, which was dependent on  $\beta$ -estradiol in the culture medium. Shown is mean  $\pm$  SD for the luciferase activity.

(A)

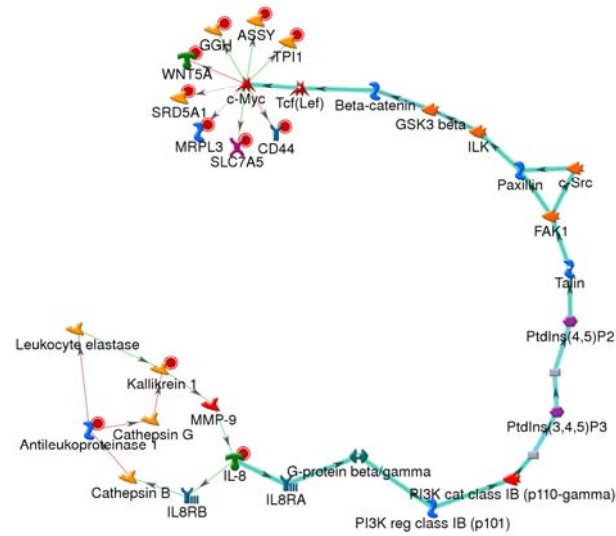

(B)

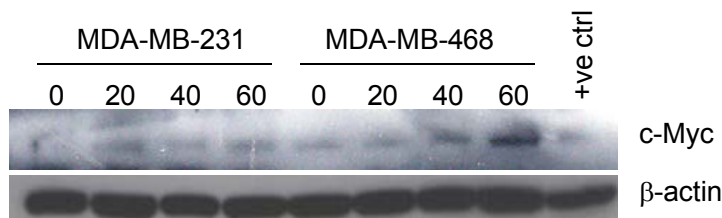

(C)

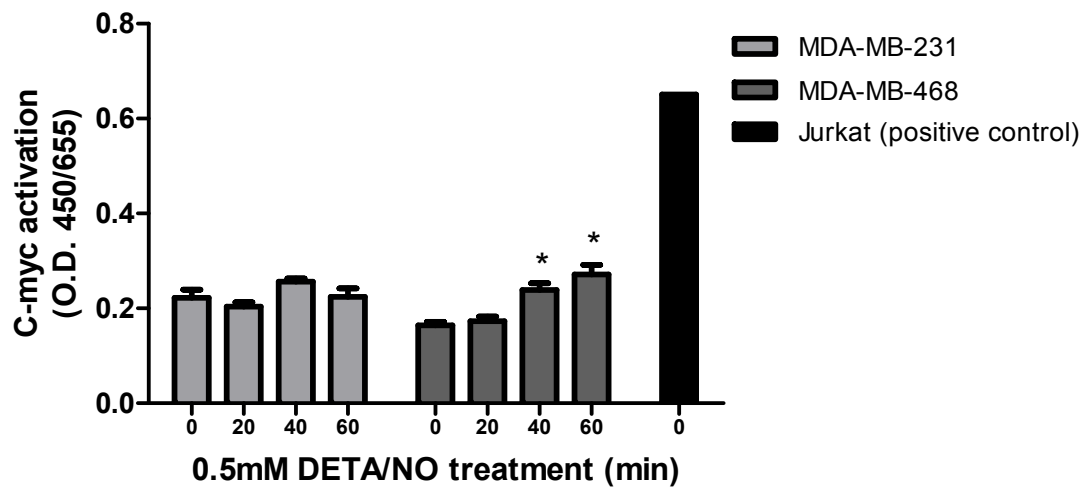

**Supplementary Figure 4 – Induction of c-Myc by the NO donor, DETA/NO.** (A) Metacore pathway analysis suggesting putative linkage of the NOS2 signature to c-Myc. (B) 0.5 mM DETA/NO increased c-Myc protein expression in MDA-MB-468 cells within 60 minutes of exposure. This effect was not observed in MDA-MB-231 cells. Positive control (ve ctrl) is a Jurkat cell extract. (C) 0.5 mM DETA/NO induced c-Myc activation in MDA-MB-468 cells within 60 minutes of exposure. This effect was not observed in MDA-MB-231 cells. Mean  $\pm$  SD.

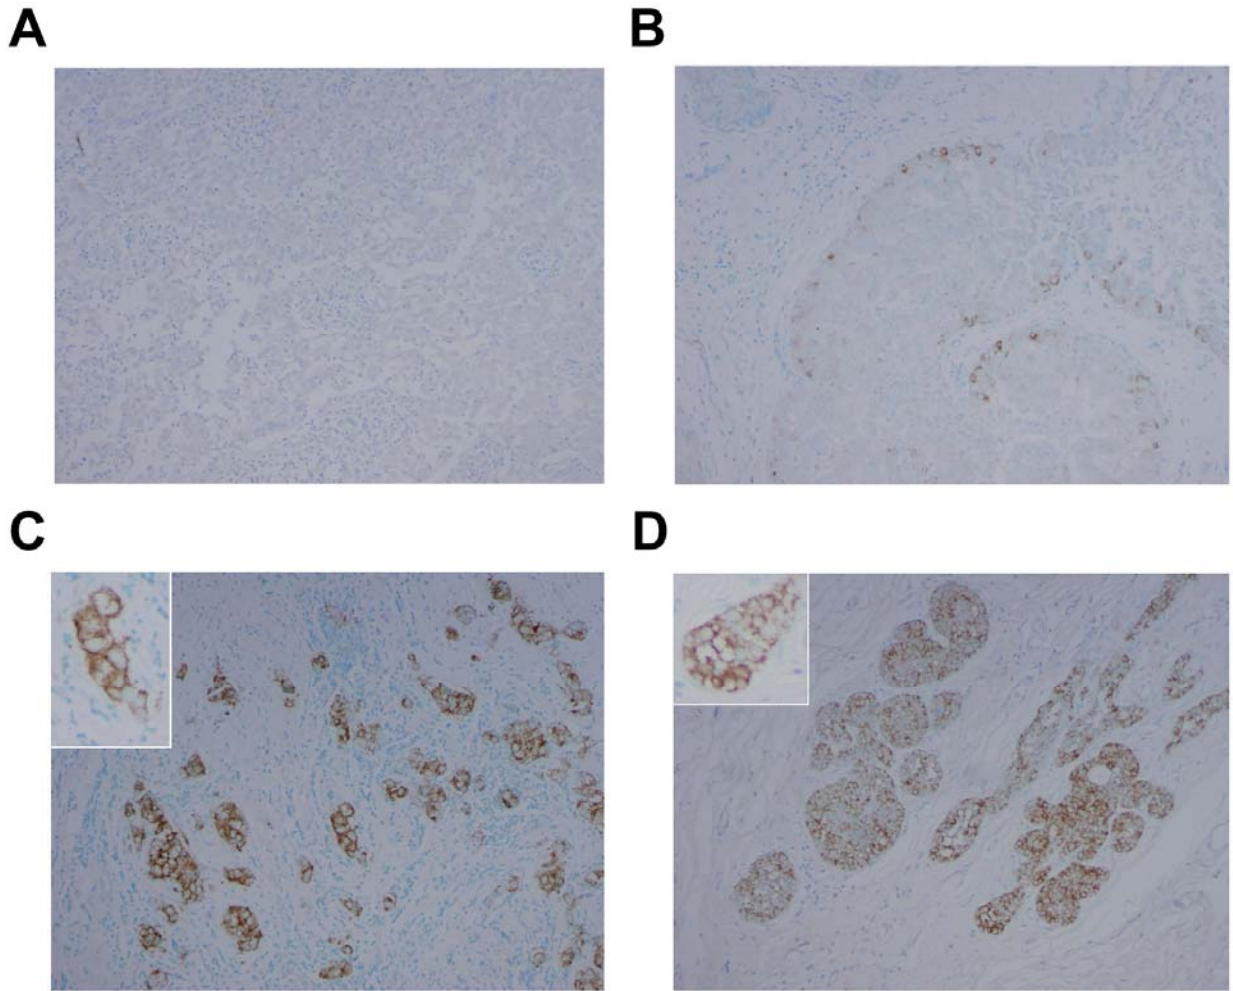

**Supplementary Figure 5 – EGFR expression in human breast tumors.** IHC analysis of invasive breast carcinomas for expression of epidermal growth factor receptor (EGFR) (A-D). EGFR was mainly detected in the cell membrane of tumor cells with some cells also showing a cytoplasmic staining of the protein. EGFR expression was not detectable in a subset of tumors (A). The pattern of EGFR expression ranged from few tumor cells being EGFR positive (B) to all tumor cells being positive for EGFR (C,D). Magnification: 100X for A,B,D; 200X for C. Counterstain: Methyl Green.

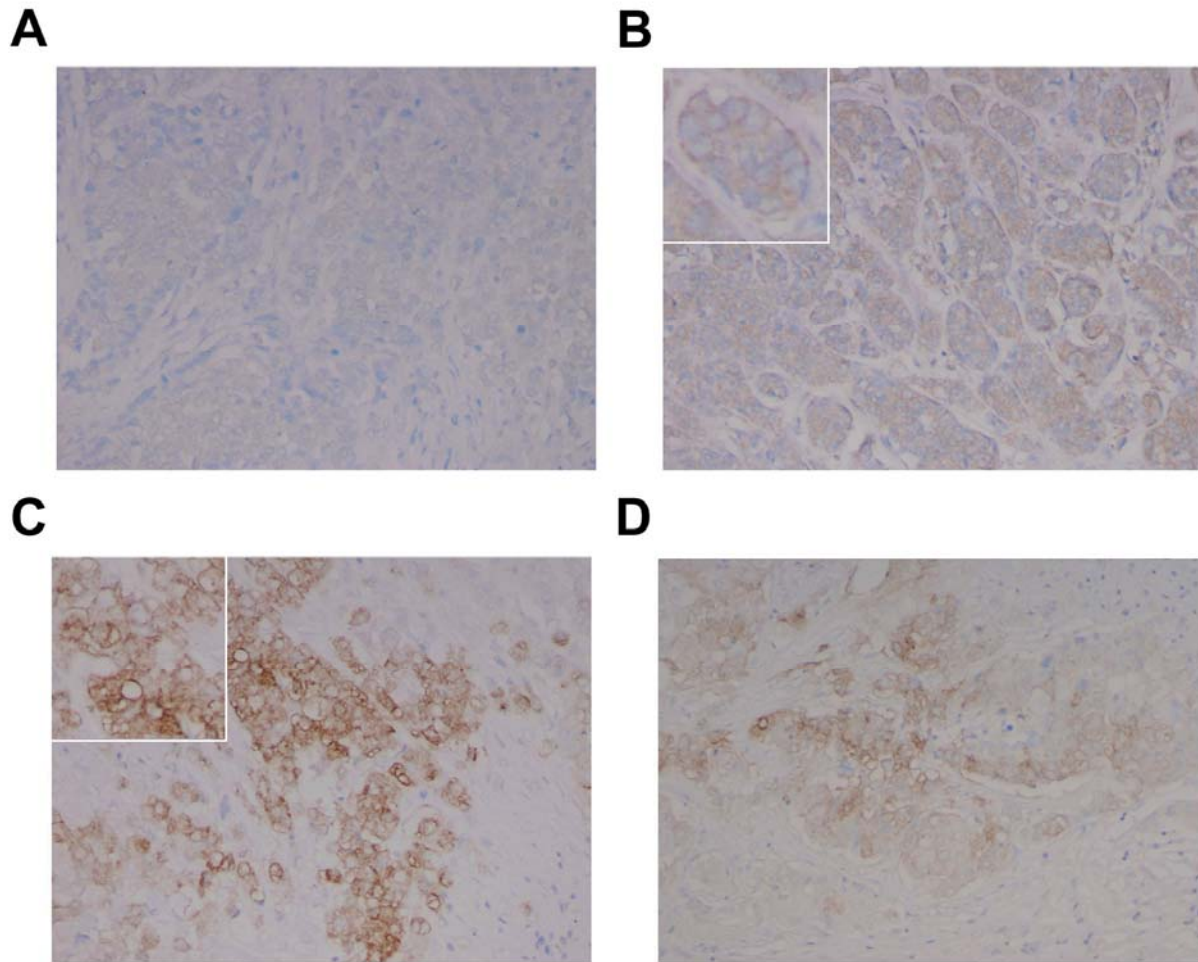

**Supplementary Figure 6 – Phosphorylation of EGFR at tyrosine 1173 in human breast tumors.** Analysis of invasive breast tumors for presence and distribution of pEGFR tyr1173 (A-D). Tumor without detectable phosphorylation of EGFR at tyrosine 1173 (A). When noticeable, phosphorylated EGFR was predominately membrane-bound but also cytoplasmic (B-D), and was either equally evident in all tumor cells (B) or was heterogeneous in intensity among the tumor cells (C,D). Magnification: 100X. Counterstain: Methyl Green.



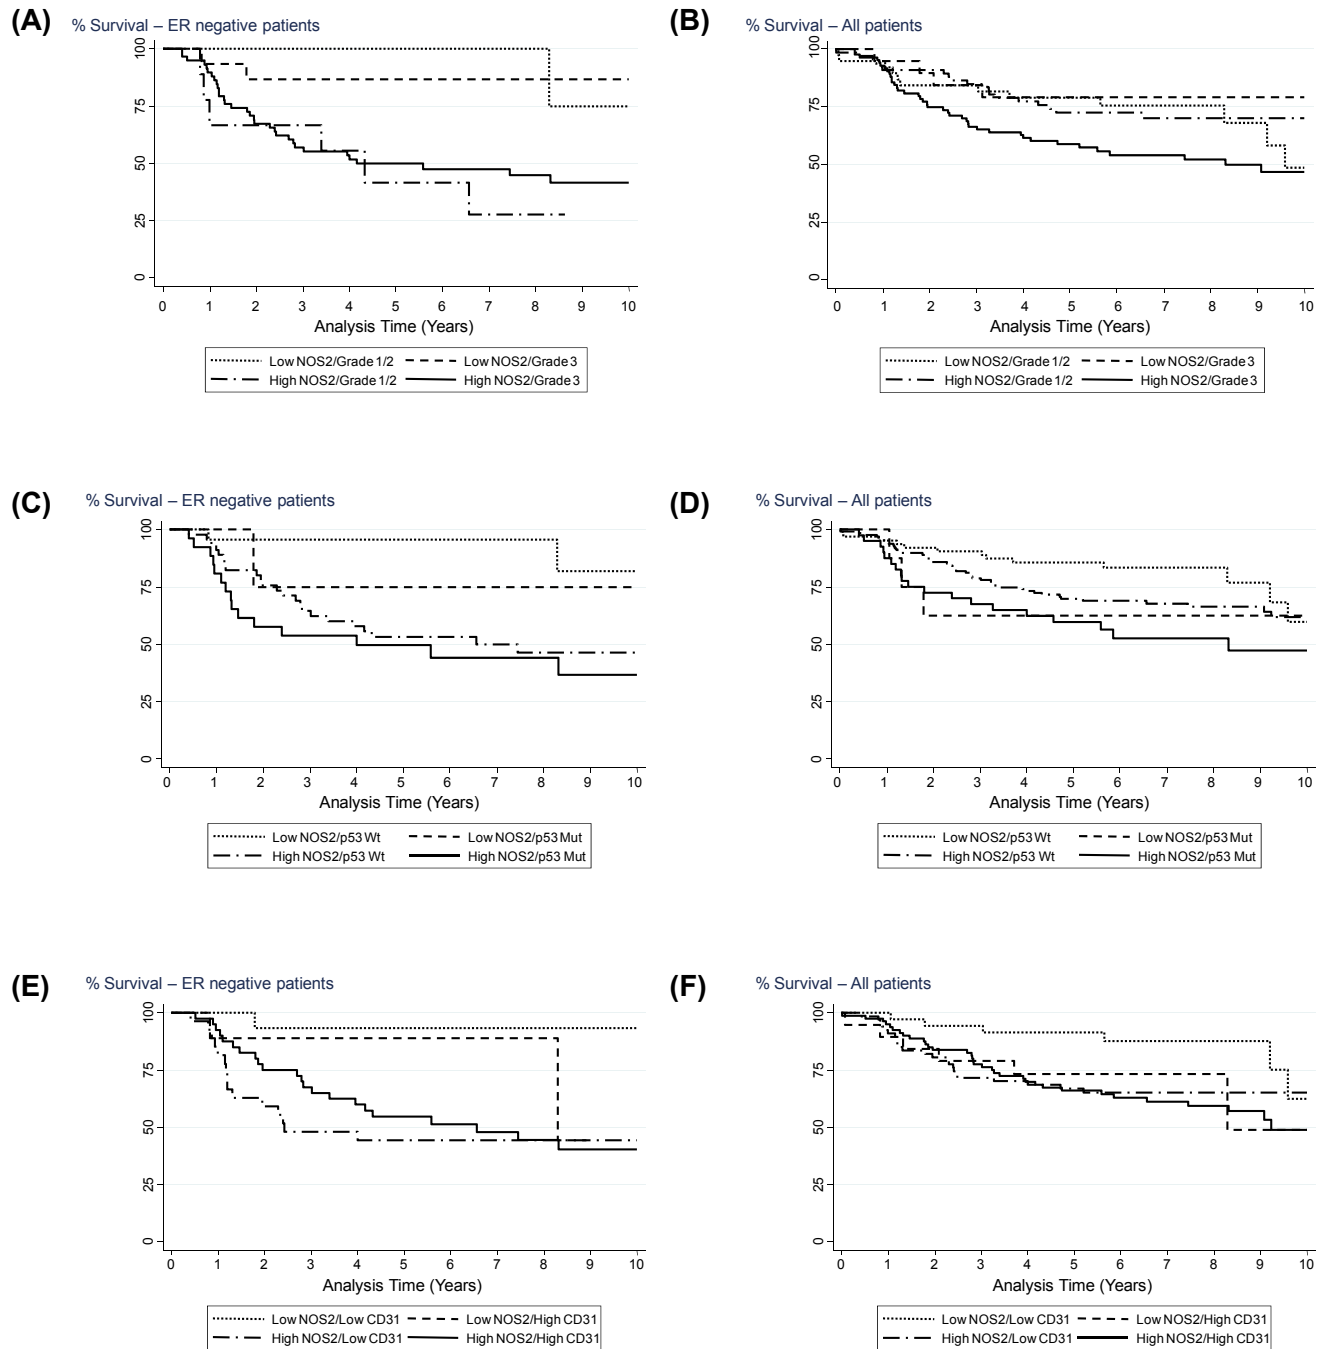

**Supplementary Figure 7 – Influence of tumor grade, p53 mutation status, and microvessel density on NOS2-related patient survival.** Kaplan-Meier cumulative breast cancer-specific survival curves of (A) ER-negative breast cancer patients by NOS2 and tumor grade (n = 89). Log-rank test:  $P < 0.015$ . (B) All breast cancer patients (n = 206).  $P < 0.039$ ; (C) ER-negative breast cancer patients by NOS2 and p53 mutation status (n = 98).  $P < 0.004$ . (D) All breast cancer patients (n = 238).  $P < 0.042$ ; (E) ER-negative breast cancer patients by NOS2 and microvessel density (= CD31 count) (n = 91).  $P < 0.008$ . (F) All breast cancer patients (n = 201).  $P < 0.129$ . A cutoff at the median was used to define a low/high tumor CD31 count.
